# Supplementary material for: Roles of water in the formation and preparation of graphene oxide
Source: Royal Society of Chemistry journal article supplement (doi:10.1039/d0ra10026a), 2021-01-01

### Supplementary Information

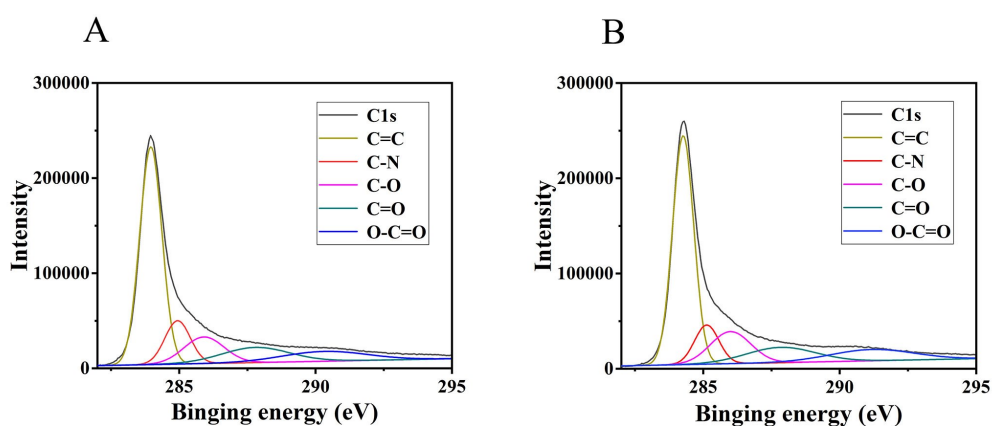

Table S1 Concentration of GO in GO-1 and GO-4 at different storage times

| Sample         | Three weeks  | Four weeks   | Five weeks   | Six weeks    |
|----------------|--------------|--------------|--------------|--------------|
| GO-1 (1 mg/ml) | 0.91 (mg/ml) | 0.87 (mg/ml) | 0.85 (mg/ml) | 0.84 (mg/ml) |
| GO-4 (1 mg/ml) | 0.94 (mg/ml) | 0.92 (mg/ml) | 0.89 (mg/ml) | 0.86 (mg/ml) |

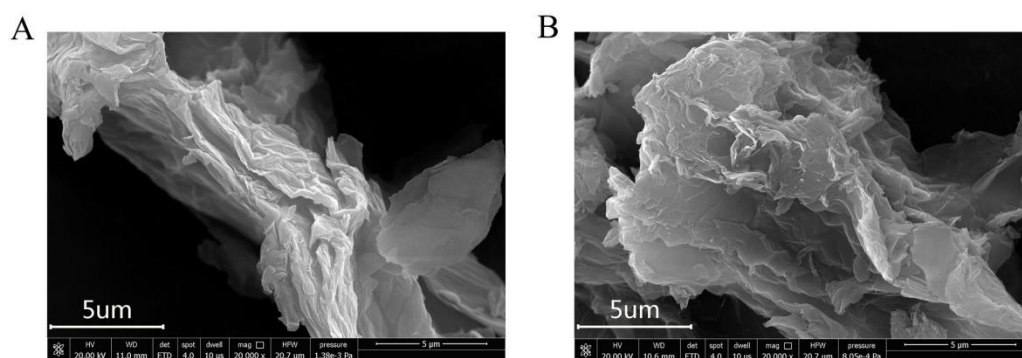

Supplement: d0ra10026a1.pdf [file d0ra10026a1.pdf]
